# Supplementary material for: Transcription factor–driven alternative localization of Cryptococcus neoformans superoxide dismutase
Source: PubMed Central journal article supplement (PMC7961099; doi:10.1016/j.jbc.2021.100391), 2021-02-07
Supplement: mmc1.pdf [file mmc1.pdf]

## Supporting Information

### **Transcription factor-driven alternative localization of *Cryptococcus neoformans* superoxide dismutase**

Aaron D. Smith<sup>1,#a</sup>, Sarela Garcia-Santamarina<sup>1,#b</sup>, Martina Ralle<sup>2</sup>, David R. Loiselle<sup>1</sup>, Timothy A. Haystead<sup>1</sup>, and Dennis J. Thiele<sup>1,3,4\*#c</sup>

<sup>1</sup>Department of Pharmacology and Cancer Biology, Duke University, Durham, North Carolina, United States of America

<sup>2</sup>Department of Molecular and Medical Genetics, Oregon Health and Science University, Portland, Oregon, United States of America

<sup>3</sup>Department of Biochemistry, Duke University, Durham, North Carolina, United States of America

<sup>4</sup>Department of Molecular Genetics and Microbiology, Duke University, Durham, North Carolina, United States of America

<sup>#a</sup>Present address: College of Sciences, George Mason University, Fairfax, Virginia, United States of America

<sup>#b</sup>Present address: The European Molecular Biology Laboratory, Heidelberg, Germany

<sup>#c</sup>Present address: Sisu Pharma, Inc.

\*Corresponding author: Dennis J. Thiele

E-mail: dthiele@sisupharma.com (DJT)

#### **Supporting Information:**

Figures S1 – S9

Tables S1 – S4

**a**

```
CnSod1      -MVKAVVVLKGESYVHGTVCFTQSEENAPVCI TGEIKDMDADAKRGMHVHEFGDNTNGCT
ScSod1      -MVQAVAVLKG DAGVSGVVKFEQASESEPTTVSYE IAGNSPNAERGFHHEFGDATNGCV
CaSod1      -MVKAVAVVRGDSKVGQTVHFQESESAPTTI SWEIEGNDPNALRGFHHQFGDNTNGCT
HsSod1      MATKAVCVLKG DGPVQGIINFEQKESNGP VKVWGSIKGLT-EGLHGFHVHEFGDNTAGCT
              .: ** * : . : . * * : * * . . . * . : . * . . : . . * : * : * : * * * * * .

CnSod1      SAGPHYNPFKHHGAPT DSERHVGDLGNIQTNSCGAAQLDFSDKIISLYGPHSIIIGRSLV
ScSod1      SAGPHFNPFKKT HGAPTDEVRHVGDMGNVKTDENGVAKGSFKDSL IKLIGP TSVVGRSVV
CaSod1      SAGPHFNPFKQHGAPEDDERHVGDLGNI STDGNGVAKG TKQDLLIKLIGKDSILGR TIV
HsSod1      SAGPHFNPLSRKHGGPKDEERHVGDLGNVTADKDG VADVSIEDSVISLSGDHCIIGRTL V
              *****: : . ** * * . *****: * : : * . * . * . * * * . : : * : * : *

CnSod1      VHA STDDLKGGNEESLKTGNAGARLACGVIGIST
ScSod1      IHAGQDDLKGDTEESLKTGNAGPRPACGVIGLTN
CaSod1      VHAGTDDYKGGFEDSKTTGHAGARPACGVIGLTQ
HsSod1      VHEKADDLKGGNEESTKTGNAGSRLACGVIGIAQ
              : * ** * * . * : * . * : * * * * * * * * * : :
```

**b**

```
CnSod2      MITAIT-----RTALPRATLRTSLATMSTIRAKHTLPPLPYAYDALEPSISAEIMNLH
HsSod2      MLSR-----AVCGT SRQLAPVLGY-LGSRQKHS L PDLPYDYGALEPHINAQIMQLH
ScSod2      MFAKTA-----AANLTKKGLSLLST-TARRTKVTL PDLKWF GALEPYISGQINELH
CaSod2      MFSIRSSRVLLKASSATTRALNAAASKTFTRSKYSLPELDYEF SATEPYISGQINEIH
              * : : . . . * * : * * * : : * * * . . : * : *

CnSod2      HTKHHQTYVNGLNAAEESLQKAS-----ADGDFKTAISLQPALKFNGGGHINHS LFWK
HsSod2      HSKHHAAYVNNLNVT EEKYQEAL-----AKGDVTAQIALQPALKFNGGGHINHSIFWT
ScSod2      YTKHHQTYVNGFN TAVDQFQELSDLLAKEPS PANARKMIAIQQNIKFHGGGFTNHCLFWE
CaSod2      YTKHHQTYVNNLNASIEQAVEAK-----SKGEVKKLVALQKAINFNGGGYLNHCLWWK
              : : * * : * * . : * : : . : : : : * : : * : * * . * * : : *

CnSod2      NLAPTGSAQVKVPT-SGVFYDQVQADFGGFENLKKEMNAKTA AIQSGSGWGLGYNKATK-
HsSod2      NLS P--NGGGE PK---GELLEAIKRDFGSFDKFEKELTAASVGVQSGSGWGLGFNKER G-
ScSod2      NLAPESQGGGEPPT--GALAKAIDEQFGSLDELIKLTNTKLAGVQSGGWAFIVKNLSNGG
CaSod2      NLAPVVSQGGGQPPSEDSKLGQIVKQFGSLDKLIEITNGKLAGIQSGGWAFIVKNKANGD
              * : * . . : . : . : * * : : : : . . : * * * * : : *

CnSod2      KLEIVTTPNQDPLL SH--VPIIGT IWEHAFYLQYKNVKPDYLNAIWNVINYEEAESRL
HsSod2      HLQIAACPNQDPLQGT TGLIPLLGIDVWEHAYYLQYKNVRPDYLKAIWNVINWENVTERY
ScSod2      KLDVVTYQNTYQDTVTGP--LVPLVAIDAWEHAYYLQYQNKADYFKAIWNVINWKEASRRF
CaSod2      TIDVIT TANQDTVTDPN-LVPLIAIDAWEHAYYLQYQNVKADYFKNLWHVINWKEAERRF
              : : : * * : . : : * : * * * * * * * * * * * * * : : * * : * : *

CnSod2      KAAQ-
HsSod2      MACKK
ScSod2      DAGKI
CaSod2      EF---
```

**Figure S1. Multiple sequence alignment of Sod1 and Sod2 proteins**

Multiple sequence alignments of Sod1 (a) and Sod2 (b) reveal the highly conserved nature of the SOD enzymes and conservation of metal coordinating ligands that comprise the enzyme active sites across distantly related species. In (a) light blue highlights the Cu-coordinating ligands, light grey highlights the Zn-coordinating ligands, while the yellow highlights a shared bridging histidine residue between the Zn and Cu in Sod1. In (b) magenta highlights the conserved Mn-coordinating ligands of Sod2. Cn – *C. neoformans*; Sc – *S. cerevisiae*; Ca – *C. albicans*; Hs – *Homo sapiens*.

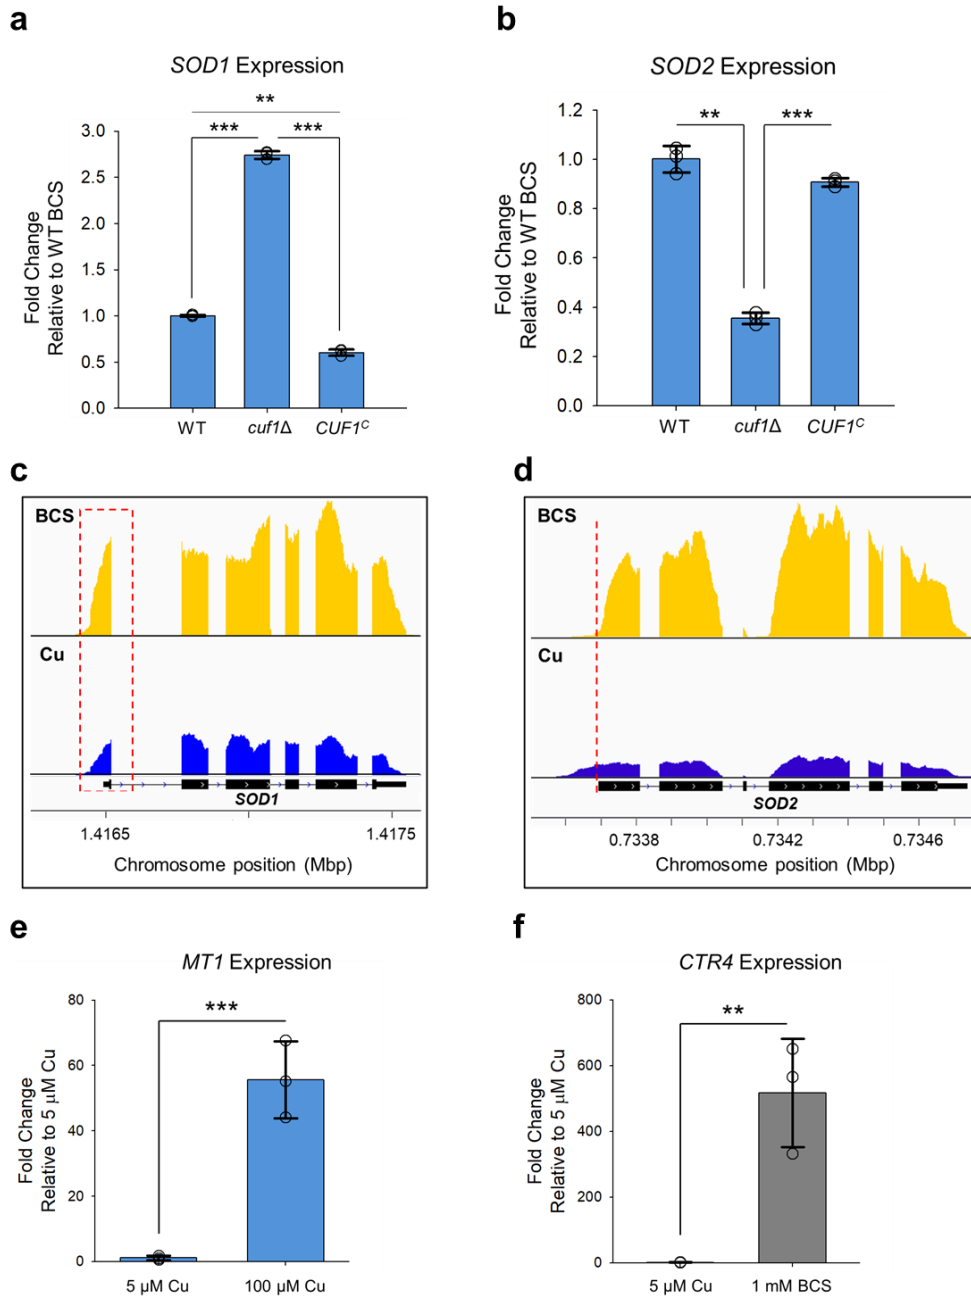

**Figure S2. The differential regulation of *SOD1* and *SOD2* is Cuf1-dependent.**

(a) qRT-PCR analysis of *SOD1* transcript levels in the WT, *cuf1Δ*, and *CUF1<sup>C</sup>* strains when treated with 1 mM BCS or 0.3 mM CuSO<sub>4</sub>. Expression levels normalized to the WT strain. N=3, 2-tailed t-test. (b) qRT-PCR analysis of *SOD2* transcript levels as in (a). N=3, 2-tailed t-test. mRNA-seq analysis of (c) *SOD1* and (d) *SOD2* in the *cuf1Δ* strain in cells treated with BCS (yellow) vs Cu (blue). Region of 5'-truncation observed in the WT strain is indicated by the red box and red dashed line for *SOD1* and *SOD2*, respectively. Sequencing reads were aligned to the *C. neoformans* H99 genome and visualized using the integrative genome viewer (IGV) (84). X-axis representative of chromosomal location (in Mbp). (e) qRT-PCR analysis of *MT1* expression in cells treated with 0.1 mM CuSO<sub>4</sub> vs 5 μM CuSO<sub>4</sub>. N=3, 2-tailed t-test. (f) qRT-PCR analysis of *CTR4* expression in cells treated with 1 mM BCS vs 5 μM CuSO<sub>4</sub>. N=3, 2-tailed t-test. \*\* p < 0.01, \*\*\* p < 0.005.

**a**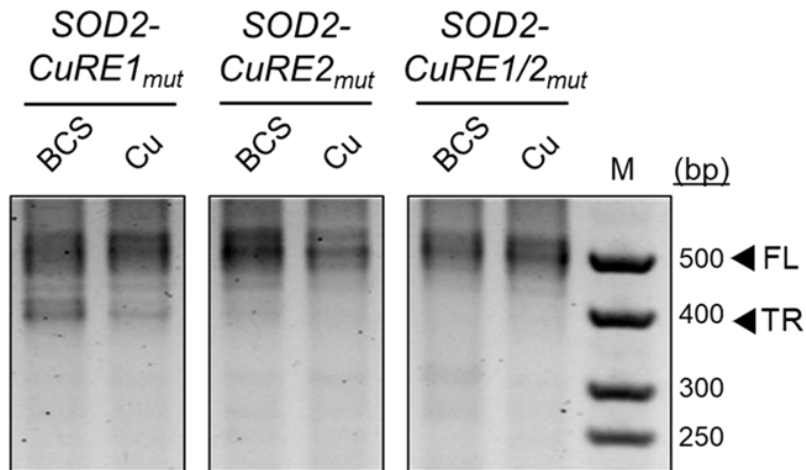**b**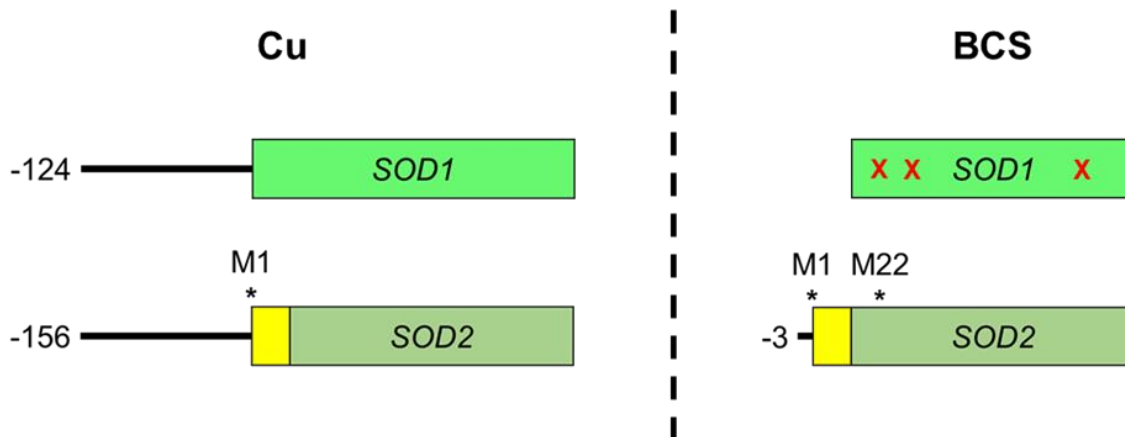

**Figure S3. Both CuRE sequences and Cuf1 are required for maximal induction of the 5'-shortened *SOD1* and *SOD2* transcripts.**

(a) Visualization of final 5'-RACE PCR products of *SOD1* and *SOD2* from the indicated strains treated with 1 mM BCS or 5  $\mu$ M CuSO<sub>4</sub>. Products were separated by agarose gel electrophoresis and visualized by ethidium bromide staining. **FL** – full length, **TR** – truncated or shortened transcript. (b) Schematic representation of the sequenced 5'-ends of the *SOD1* and *SOD2* transcripts of Cu sufficient or Cu deficient cells. Numbers represent the distance of the 5'-UTR to the translation initiation codon (+1). For the shortened *SOD1* transcript, the red “x” represents premature stop codons as a result of frameshifting. For the *SOD2* transcript, the yellow box represents the amino-terminally encoded mitochondrial import peptide and the locations of the canonically initiating codon (M1) and the downstream alternative initiating codon (M22) are indicated with asterisks.

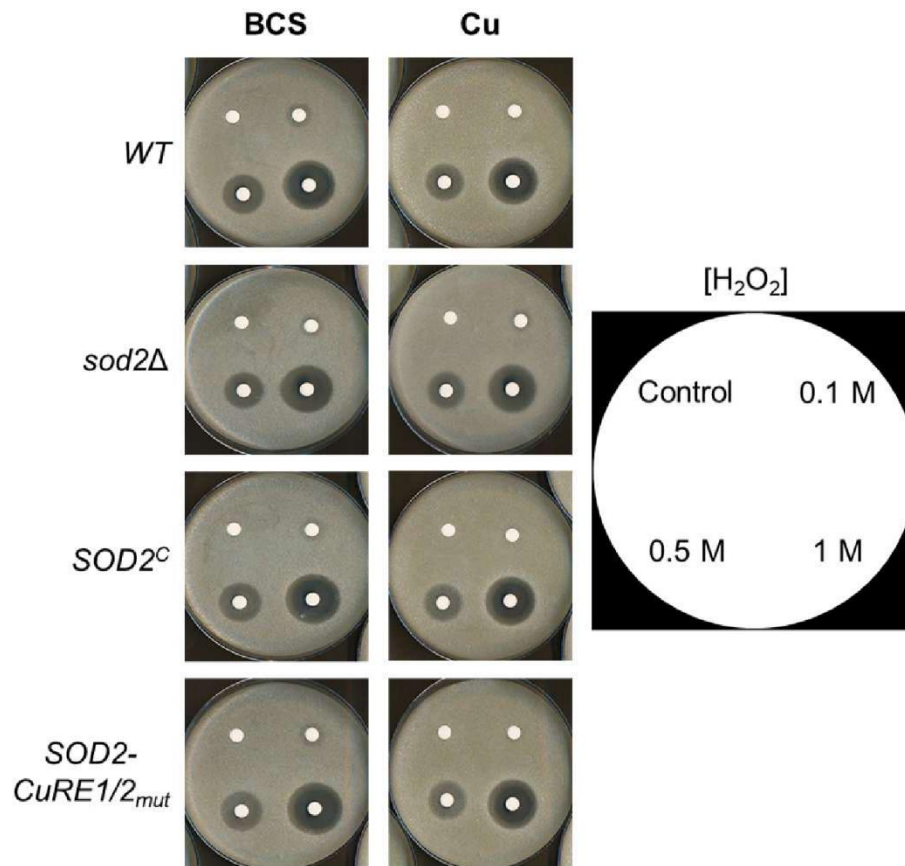

**Figure S4. Cytosolic Sod2 protects cells specifically from superoxide stress during Cu limitation.** *In vivo* cellular hydrogen peroxide sensitivities as tested by disc diffusion assays in the indicated strains and in the presence of 1 mM BCS or 0.1 mM CuSO<sub>4</sub>. Cells were challenged by spotting increasing concentrations of hydrogen peroxide on filter discs and allowing cells to incubate at 30°C for 3 days. Hydrogen peroxide concentrations are indicated on the key to the right.

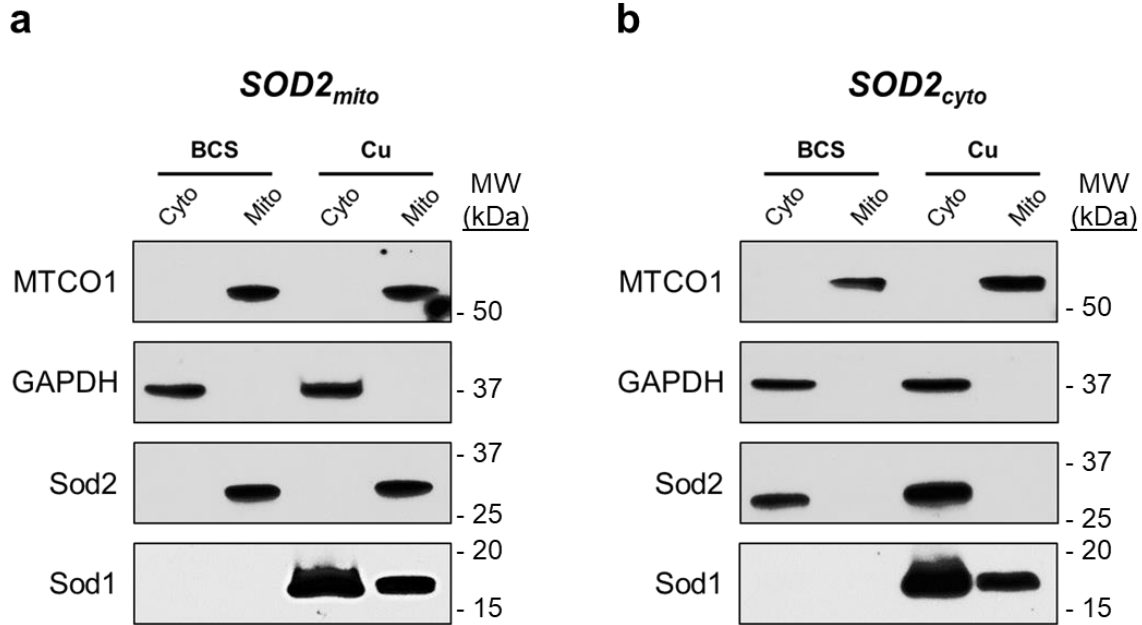

**Figure S5. *SOD2<sub>mito</sub>* and *SOD2<sub>cyto</sub>* exclusively express Sod2 in the mitochondria and cytosol, respectively.**

Subcellular fractionation of (a) *SOD2<sub>mito</sub>* and (b) *SOD2<sub>cyto</sub>* strains constitutively expressing Sod2 under transcriptional control of the actin (*ACT1*) promoter under Cu deficient (1 mM BCS) or Cu sufficient (5  $\mu$ M  $\text{CuSO}_4$ ) conditions. Sod1 and Sod2 localization were visualized by Western blotting. Control proteins specific to cytosol (GAPDH – Glyceraldehyde 3-phosphate dehydrogenase) and mitochondria (MTCO1 – Mitochondrial COX1 subunit) were included to validate fractionation efficacy.

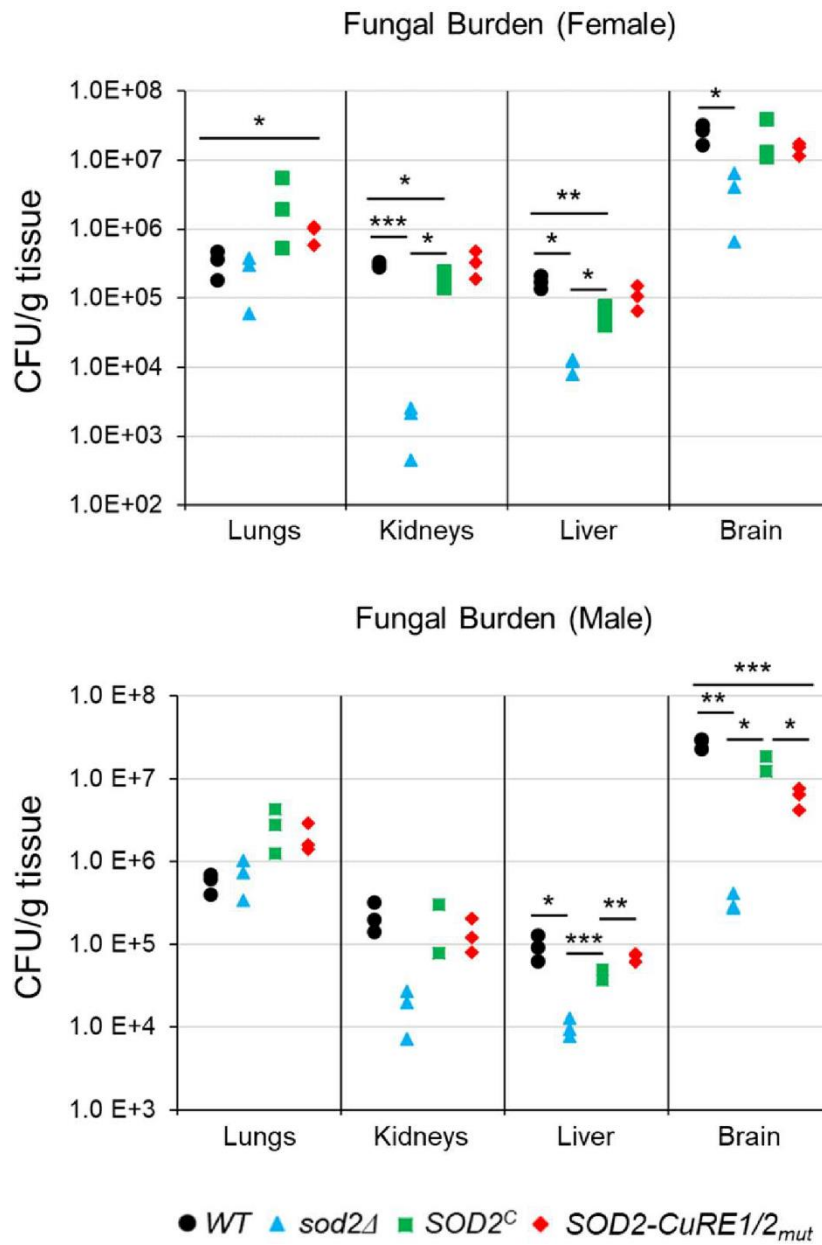

**Figure S6. Fungal burden in mice at 7 days post infection**

*C. neoformans* CFU analysis of the indicated strains from organs harvested from both male and female A/J mice 7 days post infection. Statistical differences were assessed across groups by the nonparametric Kruskal-Wallis one-way analysis of variance. F-test for variances was used between sample groups and significance determined by a 2-tailed t-test. N=3. \*  $p < 0.05$ , \*\*  $p < 0.01$ , \*\*\*  $p < 0.005$ .

## AOX1 Expression

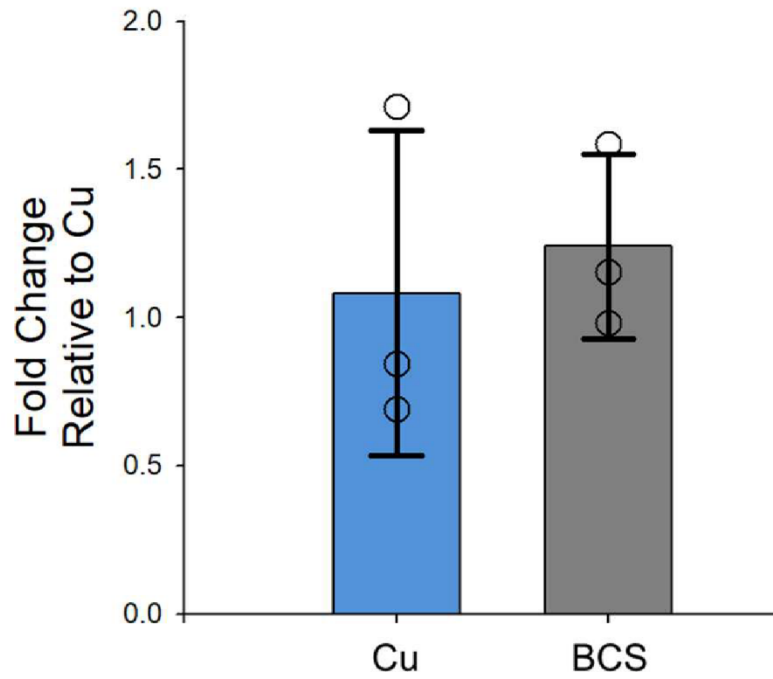

**Figure S7. AOX1 expression in Cu limited *C. neoformans* cells**  
qRT-PCR analysis of *C. neoformans* AOX1 in cells supplemented with 5  $\mu$ M CuSO<sub>4</sub> or 1 mM BCS. N=3, 2-tailed t-test.



**a****Mn Transporter Gene Expression**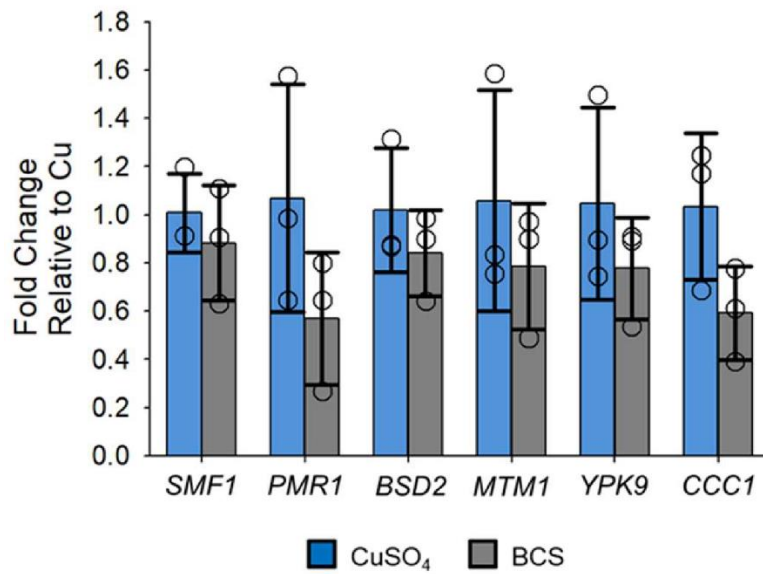**b**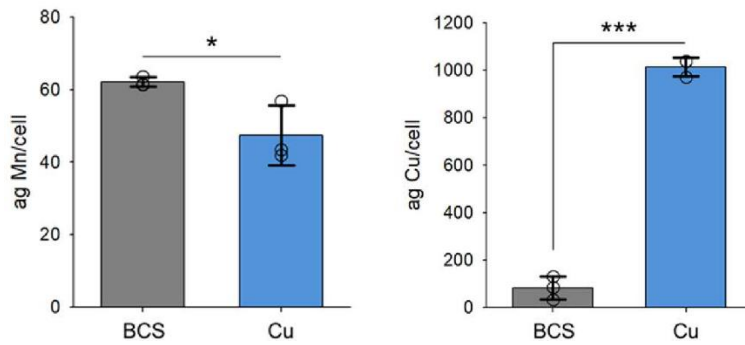**Figure S8. Cellular Mn homeostasis in Cu limited *C. neoformans* cells**

(a) qRT-PCR analysis of known Mn transporter genes in cells supplemented with 5  $\mu$ M CuSO<sub>4</sub> or 1 mM BCS. N=3, 2-tailed t-test. (b) ICP-MS metal analysis of Mn (left) and Cu (right) in whole cells supplemented with 1 mM BCS or 5  $\mu$ M CuSO<sub>4</sub>. N=3, 2-tailed t-test.

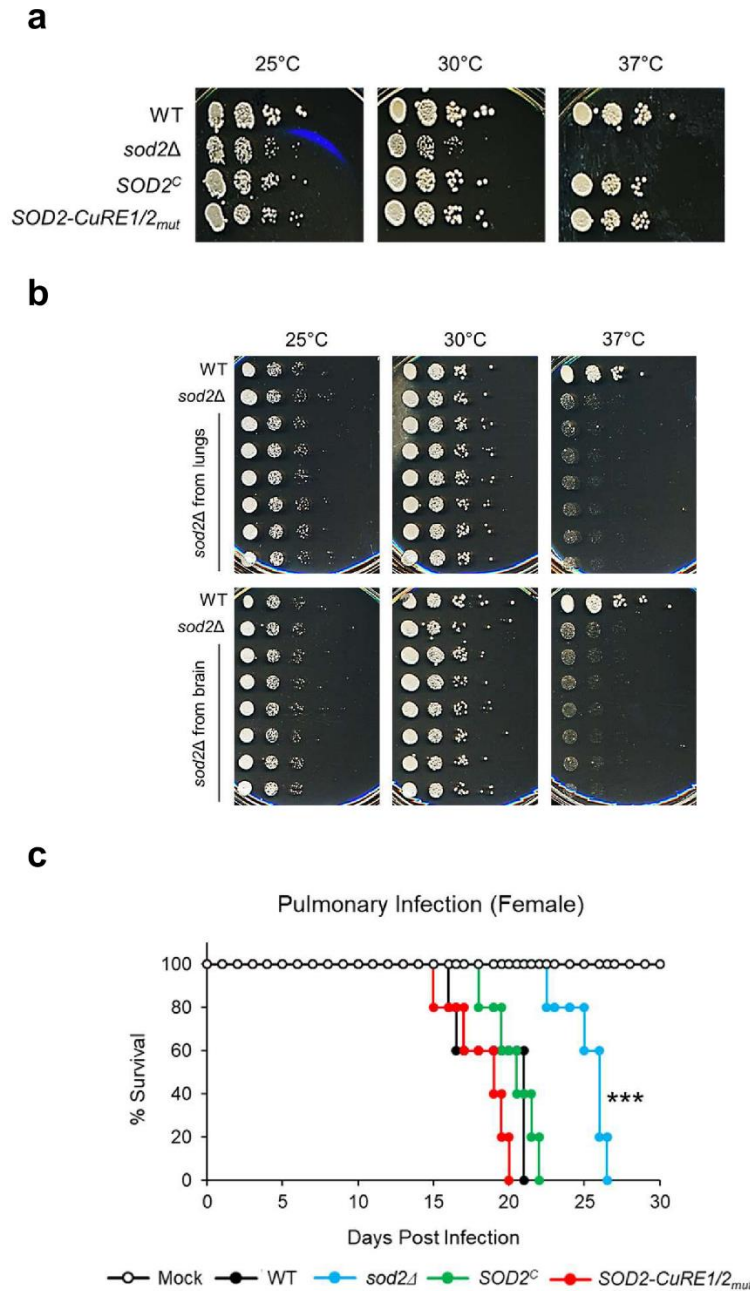

**Figure S9. Validation the *sod2Δ* strain has a temperature sensitive phenotype prior to and after mouse infection**

(a) Strains with the indicated genotypes were prepared as inoculum for the retro-orbital murine infection assays, serially diluted in 1X PBS, then spotted onto SC agar plates and incubated at 25°C, 30°C, or 37°C for 3-4 days. (b) WT and *sod2Δ* cells from glycerol stocks were grown overnight and serially diluted in 1X PBS for spotting assays. Additionally, randomly picked *sod2Δ* colonies from the CFU analysis at 7 days post infection were grown overnight and serially diluted in 1X PBS for spotting assays. Random colonies were selected from both lung and brain homogenates. Plates were incubated at 25°C, 30°C, or 37°C for 3-4 days. (c) Pulmonary infection with 5,000 cells of WT or the *sod2Δ* strains administered to female A/J mice. The survival average of mice infected with the wild-type (WT) was compared to the survival average of mice infected with any of the mutants by the long rank statistical test. Statistical differences were found between mice infected with wild-type vs mice infected with mutants. N=5. \*  $p < 0.05$ , \*\*  $p < 0.01$ , \*\*\*  $p < 0.005$

|             | <b>CuRE Site</b> | <b>nt Position*</b> | <b>Location</b> | <b>Motif Sequence</b> |
|-------------|------------------|---------------------|-----------------|-----------------------|
| <i>SOD1</i> | CuRE1            | -114                | 5'-UTR          | AAAGGCCTCA            |
|             | CuRE2            | -91                 | 5'-UTR          | ATACGCCTCA            |
|             | CuRE3            | +42                 | Intron 1        | ATATCGCTCA            |
| <i>SOD2</i> | CuRE1            | -143                | 5'-UTR          | TAAAGCCTCA            |
|             | CuRE2            | -91                 | 5'-UTR          | AATTGCCTCA            |

\*Relative to translation start site (ATG)

**Table S1. CuRE sequences of *C. neoformans SOD1* and *SOD2***

Nucleotide positioning is relative to the start of translation and context as to the location of the CuRE sequence within the genome is described.

| Cycle # | BCS      |      | Cu       |      |
|---------|----------|------|----------|------|
|         | Sequence | pmol | Sequence | pmol |
| 1       | Lys      | 24   | Lys      | 11.7 |
| 2       | His      | 13   | His      | 5.5  |
| 3       | Thr      | 14   | Thr      | 7.4  |
| 4       | Leu      | 18   | Leu      | 8.3  |
| 5       | Pro      | 14   | Pro      | 7.9  |
| 6       | Pro      | -    | Pro      | -    |
| 7       | Leu      | 13   | Leu      | 6.5  |
| 8       | Pro      | 8    | Pro      | 4.2  |

**Table S2. Sequencing results from Edman degradation of purified Sod2**

Identification of amino-terminal residues of immuno-purified Sod2 from successive cycles of Edman degradation.

**Table S3. List of strains used in this study**

| Strain ID | Strain                                           | Genotype                                                            | Description                                                                                                                                                 | Source                          |
|-----------|--------------------------------------------------|---------------------------------------------------------------------|-------------------------------------------------------------------------------------------------------------------------------------------------------------|---------------------------------|
| DTY758    | WT                                               | Wild type <i>C. neoformans</i> H99                                  | Wild type H99                                                                                                                                               | J. Heitman lab, Duke University |
| DTY761    | <i>cufl</i> Δ                                    | <i>cufl::NEO</i>                                                    | <i>CUF1</i> deletion by replacement with NEO cassette                                                                                                       | (43)                            |
| DTY762    | <i>CUF1</i> <sup>C</sup>                         | <i>cufl::NEO, CUF1::NAT</i>                                         | DTY761 complemented with WT copy of <i>CUF1</i>                                                                                                             | (43)                            |
| DTY982    | <i>CUF1CFLAG</i>                                 | <i>cufl::NEO, CUF1CFLAG::NAT</i>                                    | DTY761 complemented with C-terminal FLAG tagged <i>CUF1</i>                                                                                                 | (26)                            |
| SG96      | <i>SOD2-HA</i>                                   | <i>SOD2HA::NEO</i>                                                  | <i>SOD2</i> with C-terminal HA-epitope tag at endogenous genomic locus                                                                                      | This study                      |
| AS013     | <i>sod2</i> Δ                                    | <i>sod2::NAT</i>                                                    | <i>SOD2</i> deletion by replacement with NAT cassette                                                                                                       | This study                      |
| AS015     | <i>SOD2</i> <sup>C</sup>                         | <i>sod2::NAT, SOD2HA::HYG</i>                                       | <i>sod2</i> Δ complemented with wild type <i>SOD2</i> at safe haven                                                                                         | This study                      |
| AS017     | <i>SOD2-CuRE1</i> <sup>mut</sup>                 | <i>sod2::NAT, SOD2HA-CuRE1<sup>mut</sup>::HYG</i>                   | <i>sod2</i> Δ complemented with a <i>SOD2</i> CuRE1 promoter mutant at safe haven                                                                           | This study                      |
| AS018     | <i>SOD2-CuRE2</i> <sup>mut</sup>                 | <i>sod2::NAT, SOD2HA-CuRE2<sup>mut</sup>::HYG</i>                   | <i>sod2</i> Δ complemented with a <i>SOD2</i> CuRE2 promoter mutant at safe haven                                                                           | This study                      |
| AS019     | <i>SOD2-CuRE1/2</i> <sup>mut</sup>               | <i>sod2::NAT, SOD2HA-CuRE1/2<sup>mut</sup>::HYG</i>                 | <i>sod2</i> Δ complemented with a <i>SOD2</i> CuRE1/2 double promoter mutant at safe haven                                                                  | This study                      |
| AS021     | <i>SOD2</i> <sup>cyo</sup>                       | <i>sod2::NAT, pACT1-SOD2HA(M22)::HYG</i>                            | <i>sod2</i> Δ complemented with <i>SOD2</i> starting at downstream initiation codon (Met22) under constitutive actin ( <i>ACT1</i> ) promoter at safe haven | This study                      |
| AS023     | <i>SOD2</i> <sup>mtb</sup>                       | <i>sod2::NAT, pACT1-SOD2HA(M1)::HYG</i>                             | <i>sod2</i> Δ complemented with <i>SOD2</i> starting at first initiation codon (Met1) under constitutive actin ( <i>ACT1</i> ) promoter at safe haven       | This study                      |
| AS029     | <i>SOD2</i> <sup>C</sup> , <i>CUF1CFLAG</i>      | <i>sod2::NAT, SOD2HA::HYG, CUF1CFLAG::NEO</i>                       | <i>SOD2</i> <sup>C</sup> strain with C-terminal FLAG tagged <i>CUF1</i> at endogenous locus                                                                 | This study                      |
| AS030     | <i>CuRE1/2</i> <sup>mut</sup> , <i>CUF1CFLAG</i> | <i>sod2::NAT, SOD2HA-CuRE1/2<sup>mut</sup>::HYG, CUF1CFLAG::NEO</i> | <i>CuRE1/2</i> <sup>mut</sup> strain with C-terminal FLAG tagged <i>CUF1</i> at endogenous locus                                                            | This study                      |
| AS033     | <i>SOD1-FLAG</i>                                 | <i>SOD1FLAG::HYG</i>                                                | <i>SOD1</i> with a C-terminal FLAG-epitope tag at endogenous genomic locus                                                                                  | This study                      |
| AS035     | <i>sod1</i> Δ                                    | <i>sod1::NEO</i>                                                    | <i>SOD1</i> deletion by replacement with NEO cassette                                                                                                       | This study                      |
| AS037     | <i>SOD1</i> <sup>C</sup>                         | <i>sod1::NEO, SOD1FLAG::HYG</i>                                     | <i>sod1</i> Δ complemented with wild type <i>SOD1</i> at safe haven                                                                                         | This study                      |
| AS039     | <i>SOD1-CuRE1/2</i> <sup>mut</sup>               | <i>sod1::NEO, SOD1FLAG-CuRE1/2<sup>mut</sup>::HYG</i>               | <i>sod1</i> Δ complemented with a <i>SOD1</i> CuRE1/2 double promoter mutant at safe haven                                                                  | This study                      |
| AS041     | <i>SOD1-CuRE3</i> <sup>mut</sup>                 | <i>sod1::NEO, SOD1FLAG-CuRE3<sup>mut</sup>::HYG</i>                 | <i>sod1</i> Δ complemented with a <i>SOD1</i> CuRE3 promoter mutant at safe haven                                                                           | This study                      |
| AS043     | <i>SOD1-CuRE1/2/3</i> <sup>mut</sup>             | <i>sod1::NEO, SOD1FLAG-CuRE1/2/3<sup>mut</sup>::HYG</i>             | <i>sod1</i> Δ complemented with a <i>SOD1</i> CuRE1/2/3 triple promoter mutant at safe haven                                                                | This study                      |

**Table S4. List of primers used in this study**

| Primer ID | Sequence (5' -> 3')                           | Description        | Experiment         |
|-----------|-----------------------------------------------|--------------------|--------------------|
| AS082     | TATAAAGCTTGAGCAAGGTTCTCCAGAAGA                | SOD2 gene specific | 5'-RACE primer     |
| AS085     | ATATAAGCTTCCGTAGAGGGAGATGATCTT                | SOD1 gene specific | 5'-RACE primer     |
| AS115     | GCCTTCGTAATAAATGAAATTGTAGAGCCGCA<br>GCCCCATC  | SOD2 CuRE1 SDM F   | Mutagenesis primer |
| AS116     | GATGGGGCTGCGGCTCTACAATTTTCATTTATT<br>ACGAAGGC | SOD2 CuRE1 SDM R   | Mutagenesis primer |
| AS117     | CGTCTCTTGCTTCTAGTTATTGTACCAACCGC<br>ACAGTCC   | SOD2 CuRE2 SDM F   | Mutagenesis primer |
| AS118     | GGACTGTGCGGTTGGTACAATAACTAGAAGCA<br>AGAGACG   | SOD2 CuRE2 SDM R   | Mutagenesis primer |
| AS291     | TAAGCTTATGAATGAAAGTCCG                        | MT1 F              | ChIP-qPCR          |
| AS292     | CAGCTTCTGGATTGCTGTT                           | MT1 R              | ChIP-qPCR          |
| AS293     | GATTGGCATCAATCTGAGCA                          | CTR4 F             | ChIP-qPCR          |
| AS294     | CATCTAGCGGGAAGGTTGTT                          | CTR4 R             | ChIP-qPCR          |
| AS295     | TGAGTGAAAGTGGCTCATCG                          | TUB1 F             | ChIP-qPCR          |
| AS296     | AGCAAGCCAAAAACAACACC                          | TUB1 R             | ChIP-qPCR          |
| AS297     | CCACACTCGGCACTATCG                            | SOD1 F             | ChIP-qPCR          |
| AS298     | GAGGAAGATATGGATGAGAG                          | SOD1 R             | ChIP-qPCR          |
| AS301     | GGTGATGATGGGAATGACG                           | SOD2 F             | ChIP-qPCR          |
| AS303     | GGTGTATGAGATACTGTGG                           | SOD2 R             | ChIP-qPCR          |
| ASq121    | GGGTAAGTGCGAATGCAAAG                          | MT1 F              | qRT-PCR            |
| ASq122    | ACAAGCCTCACCAGATCCAC                          | MT1 R              | qRT-PCR            |
| ASq123    | GCTGAGTATGGGAAGGATGG                          | CTR4 F             | qRT-PCR            |
| ASq124    | ACCACGAAGGATTTGGTGAG                          | CTR4 R             | qRT-PCR            |
| ASq127    | CGAGTCCCTACCTCTGATG                           | GAPDH F            | qRT-PCR            |
| ASq128    | TCGGAAGCCTTCTTGATGAC                          | GAPDH R            | qRT-PCR            |
| ASq131    | CTCGACTTTTCCGACAAGATC                         | SOD1 F             | qRT-PCR            |
| ASq132    | TTGCCGAGGTCGTCAGTAC                           | SOD1 R             | qRT-PCR            |
| ASq145    | GGACCCTCTTTGTCTCACG                           | SOD2 F             | qRT-PCR            |
| ASq146    | TGAGGTAGTCGGGCTTAACG                          | SOD2 R             | qRT-PCR            |
| Act1-v1 F | CCACCCACTGCCAAGTAAA                           | ACT1 F             | qRT-PCR            |
| Act1-v1 R | CCTTGACATACCAGAGCCA                           | ACT1 R             | qRT-PCR            |
| Bsd2-v1 F | GGTCCCGATGCTGACAATGA                          | BSD2 F             | qRT-PCR            |
| Bsd2-v1 R | GGTGGCGGCAACGTATAATC                          | BSD2 R             | qRT-PCR            |
| Ccc1-v1 F | GTGGCGGGCAATGTTGTAAG                          | CCC1 F             | qRT-PCR            |
| Ccc1-v1 R | TGTGAGACCATCGGAAAGGC                          | CCC1 R             | qRT-PCR            |
| Mtm1-v1 F | AGCTCTTCCTATCCCCGAA                           | MTM1 F             | qRT-PCR            |
| Mtm1-v1 R | GATGGGGCCTTTGGATTGGA                          | MTM1 R             | qRT-PCR            |
| Pmr1-v1 F | TACTCCACCACCCTCAGGC                           | PMR1 F             | qRT-PCR            |
| Pmr1-v1 R | ATGACCGTTTCGAACAGCCC                          | PMR1 R             | qRT-PCR            |
| Smf1-v1 F | TGTTATGCGCGGGTCAAAGT                          | SMF1 F             | qRT-PCR            |
| Smf1-v1 R | ATGAGCCGACGAAGGAATGG                          | SMF1 R             | qRT-PCR            |
| Ypk9-v1 F | CATTGCGAAGGATGAGCGTG                          | YPK9 F             | qRT-PCR            |
| Ypk9-v1 R | TGGGGAAATGATGAGGGGTC                          | YPK9 R             | qRT-PCR            |
